1 **Identification of a functional small non-coding RNA encoded by African swine**  
2 **fever virus.**

3 **Laura E. M. Dunn<sup>a,b</sup>, Alasdair Ivens<sup>c</sup>, Christopher L. Netherton<sup>a</sup>, David A. G. Chapman<sup>d</sup>, Philippa M.**  
4 **Beard<sup>a,b</sup>**

5 The Pirbright Institute, Pirbright, Surrey, United Kingdom<sup>a</sup>, The Roslin Institute and Royal (Dick)  
6 School of Veterinary Studies, University of Edinburgh, Roslin, Midlothian, United Kingdom<sup>b</sup>, Centre  
7 for Immunity, Infection and Evolution, University of Edinburgh, King's Buildings, Edinburgh, United  
8 Kingdom<sup>c</sup>, Flu Manufacturing Sciences & Technology, AstraZeneca, Liverpool, United Kingdom<sup>d</sup>

9

10 **Abstract**

11 *African swine fever virus* (ASFV) causes a lethal haemorrhagic disease of domestic pigs, to which  
12 there is no vaccine available. ASFV has a large, double-stranded DNA genome that encodes over 150  
13 proteins. Replication takes place in the cytoplasm of the cell and involves complex interactions with  
14 host cellular components including small non-coding RNAs (sncRNAs). A number of DNA viruses are  
15 known to manipulate sncRNA either by encoding their own or disrupting host sncRNA. In order to  
16 investigate the interplay between ASFV and sncRNAs, study of host and viral small RNAs extracted  
17 from ASFV-infected primary porcine macrophages (PAMs) was undertaken. We discovered that ASFV  
18 infection had only a modest effect on host miRNAs, with only 6 miRNAs differentially expressed  
19 during infection. The data also revealed 3 potential novel small RNAs encoded by ASFV, ASFVsRNA1-  
20 3. Further investigation of ASFVsRNA2 detected it in lymphoid tissue from pigs with ASF.  
21 Overexpression of ASFVsRNA2 led to up to a 1 log reduction in ASFV growth indicating that ASFV  
22 utilises a virally-encoded small RNA to disrupt its own replication. This study describes the modest  
23 impact of ASFV on host sncRNAs and the identification of a functional ASFV-encoded sncRNA.

24 **Importance**

25 African swine fever (ASF) poses a major threat to pig populations and food security worldwide. The  
26 disease is endemic in Africa and Eastern Europe and rapidly emerging into Asia where it has led to  
27 the deaths of millions of pigs in the past 12 months. The development of safe and effective vaccines  
28 to protect pigs against ASF has been hindered by lack of understanding of the complex interactions  
29 between ASFV and the host cell. We focused our work on characterising the interactions between  
30 ASFV and sncRNAs. We found only modest changes to host sncRNA abundance after ASFV infection,  
31 and discovered a functional ASFV-encoded sncRNA. The knowledge from this study can be exploited  
32 to develop more effective ASFV vaccines that take advantage of the sncRNA system.

33

## 34 **Introduction**

35 African swine fever (ASF) is a highly pathogenic viral disease of swine. Virulent strains cause acute  
36 haemorrhagic fever in domestic pigs with mortality rates up to 100% (1). There is currently no  
37 effective vaccine or treatment (2). ASF is caused by African swine fever virus (ASFV), the only  
38 member of the Asfarviridae family. The virus sits within the nucleocytoplasmic large DNA virus  
39 (NCLDV) superfamily which also includes the Poxviridae. NCLDVs have large, double-stranded DNA  
40 genomes and replicate in the cytoplasm of infected cells (3). ASFV replicates predominantly in the  
41 cytoplasm of cells of the monocyte/macrophage lineage. ASFV evades the anti-viral defences in  
42 these cells by modulation of a number of host-cell pathways including type I IFN induction (4),  
43 apoptosis (5), host-cell protein synthesis (6), and the NF- $\kappa$ B and NFAT signalling pathways (7).  
44 Descriptions of these host-cell interactions are reviewed in detail in (8)

45

46 Small non-coding RNAs (sncRNAs) are classes of small RNA (<200nt) which are involved in the  
47 regulation of gene expression and genome stability, predominantly through RNA interference (RNAi)  
48 mechanisms. Eukaryotic cells produce multiple classes of sncRNA, including microRNAs (miRNAs),

49 PIWI-interacting RNAs (piRNAs) and endogenous small interfering RNAs (siRNAs) (9). These sncRNAs  
50 are involved in many biological processes including apoptosis, differentiation, stress response and  
51 immune activation (10). It is therefore unsurprising that viruses manipulate and exploit sncRNAs for  
52 their own benefit. Virus-encoded miRNAs have been identified in a number of DNA virus families  
53 including Herpesviridae, Polyomaviridae, Iridoviridae, Ascoviridae, Baculoviridae and the  
54 Adenoviridae (11). These miRNAs play a variety of roles including cell proliferation regulation,  
55 control of apoptosis and modulation of host immunity (12). For example the Kaposi's sarcoma-  
56 associated herpesvirus (KSHV) encoded miRNA, miR-K1, regulates the switch between lytic and  
57 latent viral replication by control of NF- $\kappa$ B expression via targeting of the host I $\kappa$ B $\alpha$  transcript (13).  
58 Other classes of viral ncRNAs have also been identified (reviewed in (14)). An interesting example is  
59 the Herpes simplex virus type 1 (HSV-1) encoded non-miRNA small RNAs (LAT sRNA1 and sRNA1)  
60 that regulate productive infection and inhibit apoptosis (15).

61

62 DNA viruses have also been shown to manipulate host sncRNAs by targeting specific host miRNAs as  
63 in the case of murine cytomegalovirus (MCMV) infection. MCMV induces degradation of cellular  
64 miR-27a and miR-27b which are important for MCMV replication *in vivo* (16). A more non-specific  
65 and global effect is wrought by Vaccinia virus (VACV), the prototypic poxvirus and NCLDV member,  
66 which induces widespread disruption of host miRNAs by a process of 3' polyadenylation and decay  
67 (17, 18). As RNAi is the major antiviral pathway in invertebrates, a number of arthropod-borne  
68 (arboviruses) are known to manipulate sncRNA during replication to evade this immune response.  
69 Interestingly, ASFV is currently the only known DNA arbovirus, and replicates in the soft tick vector  
70 of the *Ornithodoros* spp., which have a functional RNAi system (19). Overall, it is apparent that  
71 manipulation of sncRNA systems is a common feature of viruses in order to further their survival,  
72 replication and pathogenesis. We therefore sought to investigate the interaction between ASFV and  
73 sncRNAs.

74

75 The effect of ASFV infection on host miRNAs has been investigated *in vivo* by comparing miRNA  
76 expression in pigs infected with a virulent strain to those infected with an attenuated strain (20).  
77 These authors identified 12 miRNAs that were differentially expressed. In addition a further study  
78 looked *in vivo* at the potential for ASFV to encode its own miRNAs and concluded that ASFV does not  
79 express miRNAs *in vivo* (21). In our study, we investigated the effect of ASFV infection on sncRNA in  
80 primary porcine alveolar macrophages *in vitro*. We found that virulent ASFV infection of primary  
81 porcine macrophages had only a small impact on host miRNAs with only 6 out of 178 identified  
82 porcine miRNAs differentially expressed over a 16 h time period. Interestingly, we discovered an  
83 ASFV-encoded sncRNA that, when overexpressed, led to a significant reduction in ASFV replication.

84

## 85 **Results**

86 **ASFV infection does not induce polyadenylation or decay of cellular miRNAs.** VACV, the prototypic  
87 poxvirus and NCLDV member, has been shown to induce widespread disruption of cellular miRNAs  
88 via a process of 3' polyadenylation and decay (18) (17). In order to investigate if ASFV shares the  
89 ability of VACV to induce miRNA polyadenylation and decay porcine alveolar macrophages (PAMs)  
90 were infected with the pathogenic ASFV Benin 97/1 strain and Vero cells were infected with the  
91 Vero cell adapted ASFV strain, Ba71v. In parallel, PAMs and Vero cells were infected with VACV WR,  
92 with the samples collected and processed for northern blotting as described. The miRNA miR-27b-3p  
93 was selected as a probe for this experiment since it is extensively polyadenylated and degraded in  
94 VACV-infected cells (18). As expected, in VACV-infected Veros at 0 hpi mature miR-27b-3p was seen  
95 as a lower band (Fig 1a arrow) but by 6 hpi this mature form was almost undetectable and there was  
96 a higher molecular weight "smear" present in the lane, consistent with polyadenylation of the  
97 miRNA (Fig 1a asterisk). The higher molecular weight band above the smear in all lanes represents  
98 the precursor miRNA. By 16 hpi there was near complete decay of all forms of miR-27b-3p. In

99 comparison, mature miR-27b-3p was present at all time points in ASFV-infected Veros, with no  
100 evidence of polyadenylation or decay. In VACV-infected PAMs there was visible polyadenylation of  
101 miR-27b-3p but an absence of decay. This is likely explained by VACV being unable to undergo a  
102 complete replication cycle in PAMs (data not shown). There was no modification or reduction  
103 detected in the amount of miR-27b-3p in ASFV infected PAMs. Levels of miR-27b-3p expression was  
104 quantified and normalised to 5s (Fig 1b). This highlighted the near 100-fold reduction in miR-27b-3p  
105 expression in VACV infected Veros whereas in ASFV-infected Veros and PAMs no reduction was  
106 detected.

107

108 In order to look comprehensively at the effect of ASFV infection on sncRNA, we utilised small RNA  
109 sequencing. RNA was extracted and sequenced from three biological repeats of either mock or  
110 ASFV-infected PAMs at 0, 6 and 16 hpi. Sequences aligning to 247 different mature miRNAs were  
111 obtained, these were then filtered to only include sequences with an average  $\geq 5$  reads as these gave  
112 higher quality boxplots, reducing the total number of miRNAs identified to 178. These accounted for,  
113 on average, 73% of total trimmed small RNA reads. Data from a previous study investigating the  
114 effect of VACV infection on host miRNAs was used as a comparison (18). In ASFV-infected cells there  
115 was no variation in the miRNA proportion of the total small RNA reads at both early and late time  
116 points compared to uninfected cells (Fig 2a). This was in contrast to VACV-infected cells, which had a  
117 30% reduction in miRNA reads at an early time point (6 hpi) and over 50% reduction at late times (24  
118 hpi) (Fig 2b) (18). To assess the extent of ASFV-induced 3' modification of miRNAs, all trimmed  
119 sequences were analysed for non-templated nucleotide (nt) 3' additions after nt position 19. No  
120 difference was detected between mock and ASFV infected samples at both 6 and 16 hpi, with the  
121 proportion of reads containing miRNAs with 3' mismatches remaining at approximately 17% (Fig 2c).  
122 VACV infection led to a significant increase in the proportion of 3' modified miRNA reads, which  
123 increased from 10% in mock to 25% in infected samples at 6 hpi (Fig 2d) (18). At 24 hpi, the

124 difference was less substantial and increased from 10% in mock to 15% in infected samples, though  
125 was still statistically significant. (Fig 2d). In a final analysis of 3' miRNA modification during ASFV  
126 infection, the extent of 3' polyadenylation was examined by calculation of the proportion of miRNA  
127 reads which contained 3 or more non-templated 3' adenosine residues beyond nt position 19. No  
128 difference was detected between mock and ASFV infected samples at either 6 or 16 hpi (Fig 2e). The  
129 results from northern blotting and small RNA sequencing revealed that ASFV does not share the  
130 ability of poxviruses to induce cellular miRNA polyadenylation and decay.

131

132 **ASFV infection induces rapid changes in abundance of a select number of miRNAs.** To determine if  
133 ASFV infection induces differential abundance of specific miRNAs we used the small RNA sequencing  
134 data to analyse changes in expression of individual miRNAs during infection, relative to mock  
135 infected cells. The filtered data (miRNA  $\geq 5$  reads, 178 miRNAs in total) was used for this analysis.  
136 miRNAs were analysed for differential expression at 0, 6 and 16 hpi, relative to mock, and displayed  
137 on volcano plots (Fig 3a-c) for each time point. The majority of cellular miRNAs were not  
138 differentially expressed in response to ASFV infection. At both 6 and 16 hpi only one miRNA was  
139 significantly differentially expressed (Fig 3b, c). Expression of miR-10b increased 3.89 Log<sub>2</sub> fold at 6  
140 hpi and miR-27b-5p expression decreased 4.29 Log<sub>2</sub> fold at 16 hpi. Interestingly, the time point with  
141 the most changes in miRNA expression was 0 h (Fig 3a). The 0 h samples were collected after the  
142 virus had been incubated on the cells for 1h at 37°C. Four miRNAs were significantly upregulated at  
143 this early time point: miR-10b, miR-486-1, miR-144 and miR-199a. Overall, the sequencing data  
144 indicated that ASFV infection does not have a widespread impact on host miRNA expression, but  
145 does lead to rapid changes in the abundance of a small number of miRNAs.

146

147 In order to validate the miRNA expression changes identified from the sequencing analysis RT-qPCR  
148 was used to measure the abundance of individual miRNAs. Three more biological repeats of ASFV

149 infections were repeated in PAMs (taken from 3 different pigs), RNA extracted at 0, 6 and 16 hpi and  
150 miRNA expression examined by RT-qPCR. To confirm that the miRNA expression changes were not  
151 the result of unspecific stimulation of macrophages due to cell debris in the virus preparation, we  
152 also tested miRNA expression by RT-qPCR after the addition of a mock virus preparation. In infected  
153 PAMs, RT-qPCR validated the upregulation of miR-10b at 0h to comparable levels detected in the  
154 sequencing (Fig 4a) however the upregulation at 6 hpi was not detected. Validation of miR-144  
155 expression followed a similar pattern to the sequencing, though the upregulation was not as  
156 substantial (Fig 4b) with a log<sub>2</sub> fold change of only 2.2 compared to 7.81 found by sequencing. RT-  
157 qPCR validation of miR-27b-5p expression showed a trend for downregulation but, again, this was  
158 not as substantial as detected by sequencing with only log<sub>2</sub> fold change of -1, compared to -4 in the  
159 sequencing data at 16 hpi (Fig 4c). RT-qPCR was unable to validate miR-486-1 upregulation (Fig 4d).  
160 We were also unable to validate expression of miR-199a-1 due to its low expression in PAMs. With  
161 an average of only 17 miR-199a-1 reads per sample, a standard curve could not be generated. The  
162 mock virus preparation did not lead to the dysregulation of any of the tested miRNAs (Fig 4a-d).

163

164 We also analysed miRNA abundance in response to ASFV infection in Vero cells using the Vero cell  
165 adapted strain, Ba71v. The expression pattern of the tested miRNAs did not follow that of Benin 97/1  
166 infected PAMs with no substantial change in expression of any of the studied miRNAs (Fig 4e-f), with  
167 the log<sub>2</sub> fold change not changing beyond  $\pm 1$ . Therefore, indicating either that the changes detected  
168 in PAMs with Benin 97/1 were cell-type specific or strain specific. Overall, we conclude that ASFV  
169 infection has a focused impact on the abundance of cellular miRNAs. This impact is limited to  
170 upregulation of a small number of miRNAs (miR-10b and miR-144) at very early time points during  
171 infection, specifically of Benin 97/1 infected PAMs.

172

173 **Identification of three ASFV encoded small non-coding RNAs.** As ASFV does not mirror poxviruses  
174 by disrupting the host miRNA system on a widespread scale, there remains the potential for ASFV to  
175 utilise this system to encode its own miRNAs. To investigate this possibility, we aligned small RNA  
176 reads that did not map to known *Sus scrofa* sequences to the ASFV Benin 97/1 genome and the  
177 Ba71V genome, as this is the only isolate to have fully sequenced terminal inverted repeats. Plotting  
178 these aligned reads along the ASFV Benin 97/1 genome (Fig 5a) revealed a single peak of small RNA  
179 reads at approximately 82000 bp. This was also detected when aligned to Ba71v (Fig 5b). In addition,  
180 the Ba71v alignment revealed two peaks of small RNA reads at 57bp and 170022 bp, indicating that  
181 these are located in genome termini. We termed these 3 small RNA sequences as ASFV small RNA 1,  
182 2 and 3 (ASFVsRNA1, ASFVsRNA2, ASFVsRNA3). Both ASFVsRNA1 and ASFVsRNA3 were only  
183 detectable at 16 hpi with an average (mean) of approximately 100 reads per sample. ASFVsRNA2  
184 was detectable at both 6 and 16 hpi with an average (mean) of 240 reads per sample. The sequences  
185 of the three small RNAs are shown in Fig 5c. Analysis of sequencing data from individual samples  
186 revealed that these small RNAs were only detected in infected samples (Fig 5 d, e, f) confirming that  
187 these sequences are virally derived. Due to the higher mean abundance of ASFVsRNA2 and its  
188 appearance at 6 hpi, this RNA was taken forward for further analysis.

189

190 **Characterisation of ASFV-encoded small RNA2.** The sequence of ASFVsRNA2 aligns anti-sense (on  
191 the non-coding strand) to C147L (Fig 6a), the RNA polymerase subunit 6. This region of the gene is  
192 100% conserved in all sequenced ASFV genomes (Fig 6b). Interestingly, ASFVsRNA2 had a variable  
193 number of 3' U residues. A large proportion of reads contained 0 3' uridines, 90% at 6 hpi, which  
194 decreased to 70% by 16 hpi (Fig 6c). The number of reads containing 1 – 12 3' U residues increased  
195 over time from 10% at 6 hpi to 30% by 16 hpi (Fig 6c). The first 9 U residues are templated in the  
196 viral genome (depicted in Fig 6b) though around 10% of all reads have 10-12 at 16 hpi.

197



198 Expression of the ASFVsRNA2 was validated using RT-qPCR. RNA from both ASFV Benin 97/1 infected  
199 PAMs and Ba71v infected VEROs was extracted at 0, 6 and 16 hpi. RT-qPCR was performed using a  
200 primer specific for ASFVsRNA2 (without the polyU sequence). ASFVsRNA2 was detectable at very low  
201 levels at 0 hpi (Fig 7a), with 40-Ct values 5 or below in both cell types. By 6 hpi, ASFVsRNA2 was  
202 readily detected with a mean 40-Ct value of at least 12 in both cell types, and even more abundant  
203 by 16 hpi, with the 40-Ct value increasing by at least 2. Next, in order to visualise ASFVsRNA2,  
204 northern blotting using a radiolabelled DNA probe perfectly complementary to ASFVsRNA2 was  
205 performed on the same cellular RNA samples. The 5S ribosomal RNA was used as a loading control.  
206 The probe detected a small RNA species in infected PAMs at 6 hpi, increasing in intensity by 16 hpi. A  
207 similar band also appeared in infected VEROs at 16 hpi (Fig 7b).

208

209 To assess ASFVsRNA2 expression *in vivo*, RNA was analysed from tissues taken from pigs  
210 experimentally infected with ASFV. Outbred pigs were challenged with ASFV OURT88/1 and  
211 euthanised 5 days post challenge due to exhibiting moderate clinical signs consistent with ASF. At  
212 post-mortem examination the submandibular, mesenteric, gastrohepatic and renal lymph nodes as  
213 well as the spleen were taken from three pigs. Samples of the same tissues were also taken from  
214 one uninfected animal. RNA was extracted and RT-qPCR performed using the ASFVsRNA2 specific  
215 primer. ASFVsRNA2 was not detected in any of the samples taken from the uninfected animal.  
216 ASFVsRNA2 was detectable in all samples from animals infected with ASFV, with 40-Ct values ranging  
217 from 8 - 12 (Figure 7c), indicating that ASFVsRNA2 is produced during *in vivo* infection.

218

219 **ASFVsRNA2 is not produced through canonical miRNA biogenesis pathway.** To investigate whether  
220 ASFVsRNA2 is a miRNA, we investigated whether it is produced through the canonical miRNA  
221 biogenesis pathway by assessing its loading into Argonaute 2 (Ago2), a key protein involved in  
222 miRNA biogenesis. Lysates were harvested from ASFV infected PAMs and incubated with either an

223 anti-Ago2 antibody or non-immune rabbit sera as a negative control. Antibody-protein-RNA  
224 complexes were immunoprecipitated, and western blotting performed to identify enrichment of  
225 Ago2 in the anti-Ago2 antibody complexes compared to the non-immune antibody complexes and  
226 the non-precipitated cell lysate (Fig 8a). RNA was then extracted and RT-qPCR performed for  
227 ASFVsRNA2 and the miRNA miR-21, a highly expressed miRNA known to be loaded in RISC. Data was  
228 normalised to the small U6 RNA, which is not loaded in RISC. An eight log<sub>2</sub> fold enrichment of miR-  
229 21 was detected in the complexes precipitated with the anti-AGO2 antibody, confirming the success  
230 of the IP (Fig 8b). However, ASFVsRNA2 was very poorly enriched (log<sub>2</sub> fold-change of 1) after IP,  
231 indicating that ASFVsRNA2 is likely not produced through the canonical miRNA biogenesis pathway.  
232 We additionally used the miRNAFold program (22) to predict if the ASFVsRNA2 can form a miRNA  
233 stem-loop precursor. However, none of the *in silico* hairpin structures produced were convincing as  
234 miRNA hairpin precursors (data not shown).

235

236 **Overexpression of ASFVsRNA2 reduces viral replication.** We next sought to investigate whether  
237 ASFVsRNA2 performs a function during ASFV replication. We bypassed the canonical miRNA  
238 biogenesis pathway by synthesising single-stranded RNA mimics of the ASFVsRNA2 with and without  
239 the 3' polyU sequence. These RNA mimics were stabilised with 2'-fluoro modifications as other  
240 sncRNAs have been shown to be functional and have targeting activity with this modification (23).  
241 The experiments were performed in Vero cells using Ba71v rather than PAMs due to the higher  
242 transfection efficiency of Vero cells. The ability of Vero cells to be both transfected with an RNA  
243 mimic and infected with ASFV was first examined. Cells were transfected with a Dy547-labelled  
244 miRNA mimic, miRDIAN and at 12 h later infected with ASFV Ba71v (After a further 24 h cells were  
245 fixed, permeabilized, and labelled with an antibody targeted to ASFV early CP204L/p30 protein.  
246 Analysis by confocal microscopy showed that all ASFV infected cells (p30 positive) were also

247 transfected with the miRNA mimic, visible as red dots on the images (Fig 9a), indicating transfection  
248 and infection of the same cells had occurred.

249

250 A single-step ASFV growth curve was then carried out on Vero cells transfected with either the  
251 ASFVsRNA2 mimic, ASFVsRNA2 polyU mimic, a negative control mimic or left untransfected. After 12  
252 h, cells were infected with ASFV Ba71v and the amount of virus present determined at the time  
253 points shown by calculating the TCID50 (Fig 9b). The negative control mimic had no effect on viral  
254 replication, with no difference in viral TCID50 at any time point compared to the non-transfected  
255 cells. At 12 hpi, ASFV replication in cells transfected with the ASFVsRNA2 mimic had an  
256 approximately 0.5 log reduction in comparison to the non-transfected cells. Replication in these cells  
257 recovered by 24 hpi to a similar level as the negative control and non-transfected cells. Interestingly,  
258 the ASFVsRNA2 polyU mimic had a significant impact on replication only at 24 hpi, with an  
259 approximately 1 log reduction. The results therefore suggest that ASFV utilises both the 3' uridylated  
260 and non-uridylated forms of this virally-encoded small RNA to regulate its own replication, and that  
261 the two forms are involved at different time points during replication.

262

## 263 **Discussion**

264 With no effective vaccine or treatment, methods to control ASFV outbreaks are limited. As a result,  
265 after reaching the European Union (EU) in 2014 ASFV has subsequently spread throughout eastern  
266 Europe. In addition, the virus emerged in China in 2018 and has since spread rapidly across South  
267 East Asia with outbreaks declared in Vietnam, Cambodia, Mongolia and Hong Kong (24) . ASFV in  
268 China has substantially impacted the food security in the world's largest pig producer (25).  
269 Improving current ASFV vaccines and developing novel vaccines is therefore a priority. We therefore  
270 sought to investigate the interaction between ASFV and sncRNAs in order to gain more knowledge of

271 ASFV host-pathogen interactions. Many viruses have been found to exploit and manipulate sncRNAs.  
272 This can range from subtle effects on specific host miRNAs to widespread disruption of miRNAs, such  
273 as in the case of poxviruses (17, 18). The mechanism of VACV-mediated miRNA polyadenylation is  
274 assumed to be mediated by the virally-encoded poly(A) polymerase (PAP), VP55 (17). The viral PAP is  
275 conserved throughout the NCLDV superfamily with the C475L gene identified as the putative ASFV  
276 PAP (26). We therefore first investigated whether ASFV shares the ability of poxviruses to induce  
277 miRNA polyadenylation and their subsequent decay. Both northern blotting and small RNA  
278 sequencing revealed no evidence of widespread miRNA polyadenylation and decay in ASFV-infected  
279 cells. This characteristic is therefore not conserved throughout the NCLDV superfamily and may be  
280 unique to poxviruses.

281

282 In contrast to poxviruses, this study found ASFV infection has only a modest impact on host miRNAs,  
283 with only 6 miRNAs identified by sequencing to be differentially expressed during ASFV infection,  
284 and only 3 of these robustly validated by RT-qPCR. This more subtle effect on miRNAs is more  
285 common in virus infections than the widespread disruption that poxviruses induce (27). For example,  
286 pseudorabies virus infected porcine dendritic cells led to the differential expression of only 8 miRNAs  
287 (28). A previous study examined miRNA expression in spleen and lymph node collected from pigs  
288 inoculated with a virulent and attenuated ASFV strain (19). This study identified differential  
289 regulation of 22 miRNAs in the spleen and 33 in the lymph node 3 days post inoculation. The only  
290 miRNA identified common to this study was miR-10b, which was found to be lightly downregulated  
291 between 3 and 7 dpi animals infected with a virulent ASFV strain. It is difficult to directly compare  
292 results as the previous study compared miRNA expression in pigs infected with a virulent strain to  
293 those infected with an attenuated strain, not uninfected animals. Additionally, our *in vitro* study  
294 focused on a single viral replication cycle over 16 hours whereas the *in vivo* experiment analysed

295 viral infection over multiple days. However, the identification miR-10b as differentially expressed *in*  
296 *vivo* supports our theory that miR-10b plays a role during ASFV infection.

297

298 The upregulation of miR-10b occurred at 0 hpi, after the virus has been incubated on cells for only 1  
299 h, but then rapidly decreased in abundance by 6 hpi. Further experiments using the porcine  
300 pestivirus classical swine fever virus (CSFV) also led to a similar pattern in miR-10b expression, with  
301 rapid upregulation of during the first hour of infection and subsequent decrease (data not shown).  
302 Both ASFV and CSFV are enveloped viruses and have been found to enter porcine macrophages via  
303 endocytosis (29) (30). In macrophages, miR-10b is known to target ATP binding cassette transporter  
304 A1 ABCA1 (31), which is involved in the regulation of cholesterol efflux. During infection with ASFV,  
305 cholesterol remodelling is essential in the establishment of productive viral infection and disruption  
306 of cellular cholesterol efflux leads to the impairment of virus entry and viral particles remained  
307 trapped in endosomes (32). This therefore suggests a link between miR-10b, ABCA1 and cholesterol  
308 efflux during endocytic-mediated entry of ASFV in macrophages.

309

310 A key finding of this study was identification and characterisation of an ASFV-encoded sncRNA,  
311 ASFVsRNA2. Due to their large genome size, DNA viruses have the coding capacity to encode miRNAs  
312 and many do, predominantly the nuclear replicating herpesviruses. As canonical miRNA biogenesis  
313 begins in the nucleus with host RNA Pol II transcription from the viral genome, it is assumed viral  
314 miRNA biogenesis requires a nuclear phase of viral replication. Indeed, virus-encoded miRNAs have  
315 been identified in NCLDVs that also have a nuclear phase of replication. These are in two  
316 Iridoviruses: Singapore grouper iridovirus (SGIV) (33) and Tiger Frog Virus (TGV) (34). Several studies  
317 have identified the presence of ASFV genomes in the nucleus at early time points in infection (35),  
318 this nuclear phase remains poorly understood but it indicates the possibility for ASFV to encode  
319 miRNAs.

320

321 Our study identified ASFVsRNA2 in both PAMs and tissues from pigs with ASFV (Fig 7a-c). A previous  
322 *in vivo* study concluded that ASFV does not express viral miRNAs in experimentally infected pigs (21).  
323 However, the previous study restricted its analysis to miRNA only based on predictions of pre-cursor  
324 miRNA structures and did not consider other classes of sncRNA. Since a number of virus families  
325 encode different classes of sncRNAs (reviewed in (14)) we chose to sequence the small RNA fraction  
326 from ASFV-infected cells without bias, and therefore allowed us to report the first identification of  
327 an ASFV-encoded sncRNA.

328

329 Our research has indicated that ASFVsRNA2 does not fit the classic miRNA biogenesis pathway as it  
330 does not have an identifiable hairpin precursor and fails to enrich in an Ago2 immunoprecipitate.  
331 However, it is known that a number of viral miRNAs are produced through non-canonical pathways.  
332 (36). For example, miRNAs encoded by murine  $\gamma$ -herpesvirus 68 (MHV68) in which the pre-cursor  
333 miRNAs are located in a tRNA-like structure. (37). Despite this variety of biogenesis pathways,  
334 miRNAs are required to be loaded into an Ago protein in order to function. Pigs, like other mammals,  
335 have been found to encode 4 Ago proteins (Ago1-4) (38), though only Ago2 is catalytically active and  
336 has the ability to cleave target mRNA (39). It has been reported that miRNAs are not sorted into  
337 distinct human Ago proteins (40) and so miRNAs would be expected to be found in all Ago proteins.  
338 Therefore, our inability to detect ASFVsRNA2 enrichment in an Ago2 immunoprecipitation indicates  
339 that ASFVsRNA2 is not a miRNA.

340

341 The presence of polyuridine (polyU) residues on the 3' end of ASFVsRNA2 is intriguing. The first 9 of  
342 these uridine residues are templated in the ASFV genome, though a small percentage of reads at 16  
343 hpi have 10-12 uridine residues. It is likely that the variation in the number of templated uridine

344 residues is a result of ASFVsRNA2 biogenesis. ASFV transcription termination takes place at a  
345 conserved motif of seven or more consecutive thymidylate residues (41) and this poly(T) motif is  
346 retained in the mRNA (42). As the location ASFVsRNA2 maps to in the genome does not correspond  
347 to a 3' end of any known gene, this polyU motif could be the termination signal for ASFVsRNA2  
348 transcription. The non-templated additions may indicate a modification to ASFVsRNA2 as the main  
349 function of non-coding RNA uridylation is to promote its degradation (43). However, it can also have a  
350 number of other functions. For example, uridylation of the miRNA let-7 pre-cursor is required for let-  
351 7 biogenesis (44). It can also control the activity of non-coding RNA, for instance uridylation of miR-  
352 26 prevents it binding to its target IL-6 transcript but does not affect miRNA stability (45). The  
353 functional significance of the uridine residues, templated or not, on the 3' end of ASFVsRNA2 is  
354 currently unknown, though our work has indicated it is of importance.

355

356 Overexpression of ASFVsRNA2 reduced ASFV replication in Vero cells, suggesting it has a role in the  
357 control of viral replication. This relatively modest effect, between 0.5-1 log reduction, is consistent  
358 with sncRNA gene targeting since miRNAs usually regulate gene transcript levels by less than 2-fold  
359 (46). Even though we do not believe ASFVsRNA2 to be a miRNA, the predominant function of all  
360 classes of sncRNAs is to induce gene silencing (47). Therefore, we would also expect ASFVsRNA2 to  
361 have only a modest effect. Many viruses are known to encode activators and repressors to finely  
362 control their life cycle in order to replicate in the face of the host immune response. An interesting  
363 example of this is the Human Cytomegalovirus (HCMV) encoded miRNA, miR-UL112-1, which has  
364 been found to downregulate multiple viral genes involved in replication, leading to a decrease in  
365 genomic viral DNA (48).

366

367 In summary, we have found that ASFV infection has a very modest impact on host sncRNA and  
368 instead utilises this system to encode its own, ASFVsRNA2, which retards viral replication. The

369 discovery of an ASFV-encoded sncRNA has added another level to the knowledge of ASFV replication  
370 and opens up the possibility of sncRNA-based mechanisms to develop the next generation of ASFV  
371 vaccines.

372

## 373 **Materials and methods**

374 **Cells and viruses.** African green monkey epithelial cells (Vero) were grown in Dulbecco's modified  
375 Eagle's medium (DMEM) (Life Technologies), containing 100 units/ml penicillin, 100µg/ml  
376 streptomycin (pen/strep) (Sigma), and 10% foetal bovine serum (FBS) (Life Technologies). Cells were  
377 maintained at 37°C with 5% CO<sub>2</sub> and were passaged regularly to maintain viability. Primary porcine  
378 cells were derived from 4 week old Large White outbred pigs. Porcine alveolar macrophages (PAMs)  
379 were obtained by lung lavage with PBS and maintained in RPMI 1640 GlutaMAX™ (Life Technologies)  
380 containing 100 units/ml penicillin, 100µg/ml streptomycin (pen/strep) (Sigma) and 10% porcine  
381 serum (BioSera). Bone marrow cells were prepared from femur bones and maintained in Earle's  
382 balanced salt solution (EBSS) 100 units/ml penicillin, 100µg/ml streptomycin (pen/strep) (Sigma),  
383 10% porcine serum (BioSera) and 10mM HEPES. The pathogenic ASFV Benin 97/1, previously  
384 described in (49) was grown in primary porcine bone marrow cells and the tissue-culture adapted  
385 ASFV BA71V, previously described in (50) was grown in Vero cells. Experiments involving VACV used  
386 the Western Reserve (VACV-WR) strain, prepared by purification on 36% (wt/vol) sucrose cushion.  
387 Experiments involving CSFV used the Brescia strain, kindly provided by Dr Julian Seago (The Pirbright  
388 institute)

389

## 390 **Animal experiments and Ethics Statement**

391 Animal experiments were carried out under the Home Office Animals (Scientific Procedures) Act  
392 (1986) (ASPA) and were approved by the Animal Welfare and Ethical Review Board (AWERB) of The



393 Pirbright Institute. The animals were housed in accordance with the Code of Practice for the Housing  
394 and Care of Animals Bred, Supplied or Used for Scientific Purposes, and bedding and species-specific  
395 enrichment were provided throughout the study to ensure high standards of welfare. Through  
396 careful monitoring, pigs that reached the scientific or humane endpoints of the studies were  
397 euthanised by an overdose of anaesthetic. All procedures were conducted by Personal Licence  
398 holders who were trained and competent and under the auspices of Project Licences. Female  
399 Landrace × Large white (Yorkshire) × Hampshire pigs were obtained from a high health farm in the  
400 UK. Animals were challenged intramuscularly in the rump with 10,000 HAD of the OUR T88/1 strain  
401 of ASFV. Tissue samples were collected from three pigs at post mortem five days post challenge.

402

403 **Preparation of RNA samples.** Confluent 6-well plates of Veros and PAMs were infected or mock-  
404 infected with ASFV or VACV at an MOI of 10 for 1h at 37°C. The inoculum was removed (0h time  
405 point), cells were washed 3x in PBS and media, containing 2.5% serum, was replaced. At 0, 6 and 24  
406 hpi cells were harvested into an appropriate volume of QIAzol lysis reagent (Qiagen) and RNA  
407 prepared using the miRNeasy Mini Kit (Qiagen). For RNA extraction from animal tissues, the tissues  
408 were harvested into RNAlater (Life Technologies) and stored at -80°C. 50mg of tissue was added to  
409 700µl Qiazol lysis reagent (Qiagen) and homogenised using tissue grinding lysate matrix beads (MP  
410 Biomedicals). RNA was prepared using the miRNeasy Mini Kit (Qiagen), including an on-column  
411 DNase digest (Qiagen).

412

413 **Northern blot analysis.** Northern blotting was carried as described in (18). Briefly, 5µg RNA was  
414 mixed with 2x TBE-UREA buffer (Novex) and heated at 70°C for 3 min. Samples were run on a 15%  
415 polyacrylamide TBE-UREA gel (BioRad). The gel was then transferred to a solution of 0.5 x TBE  
416 containing 10,000 x SYBR gold (Invitrogen) and visualised under UV light to check for equal loading.  
417 The RNA was transferred to a Hybond N<sup>+</sup> membrane (Amersham) using a semi-dry transfer machine

418 and cross-linked as described in (51). DNA probes perfectly complementary to a small RNA were  
419 prepared by labelling with P<sup>32</sup> using the mirVana probe and marker kit (Ambion) Membranes were  
420 pre-hybridised in ULTRAhyb hybridisation buffer (Ambion) for 1hr at 42°C prior to incubation with a  
421 P<sup>32</sup>-labelled DNA probe, overnight at 42°C. Membranes were then washed twice in 2x SSC with 0.1%  
422 SDS for 15 min and laid against a phosphorimage screen for 4-6hrs. Labelling was detected using a  
423 Typhoon FLA 7000 phosphorimager (GE Healthcare). To strip the membrane for re-probing it was  
424 washed in a solution of boiling 0.1% SDS for 30min.

425

426 **Small RNA sequencing.** Integrity of the RNA was measured on a Bioanalyzer (Agilent), with all  
427 samples having a RIN value of 8 or above. Small RNA sequencing libraries were prepared using  
428 CleanTag small RNA kit (TriLink). Libraries were pooled, gel purified on a 5% polyacrylamide TBE gel  
429 (BioRad) and sequenced on an Illumina HiSeq (Edinburgh Genomics). An average of 7013808 ±  
430 3522153 reads per samples were generated. Quality of reads was assessed using FASTQC and  
431 adapters trimmed using cutadapt software. Sequences were collapsed within each sample to  
432 generate a non-redundant set of fasta sequences. Singletons were not included. The reference used  
433 for alignment was version 10.2 of the *Sus scrofa* genome obtained from Ensembl, only full-length  
434 perfect match (FLPM) sequences were counted. Sequences aligning to the genome were  
435 subsequently used as input for a mirDeep2 analysis. Alignments were performed using a non-current  
436 version of bowtie-based Perl script (mapper.pl) that forms part of the mirDeep2 software package.  
437 The mirDeep2 version was 2.0.0.4 and the bowtie version was 0.12.5. Parameters used were `-o 20 -l`  
438 `17 -r 100 -c`. The analysis used *Sus scrofa* mature (3p and 5p forms) and precursor sequences  
439 obtained from mirBase (release 21). Small RNA reads that did not map to *Sus scrofa* sequences on  
440 mirBase were aligned to the ASFV BA71V genome (Genbank: U18466.2) and ASFV Benin 97/1  
441 genome (Genbank: AM712239.1). Sequencing data was deposited in NCBI GEO database under  
442 accession GSE115512

443

444 **Differential expression analysis.** Initial raw counts were filtered to only include those with an  
445 average of 5 reads or more. The counts within each sample were converted to abundances, which  
446 were (1) multiplied by one million to generate a reads set, (2) one count added to all to preclude  
447 zero counts instances, and (3) the resultant values converted to log<sub>2</sub> and quantile normalised.  
448 Pairwise comparisons of sample groups were performed on the normalised tag counts using linear  
449 modeling (Bioconductor *limma* package). A series of 6 group-wise comparisons using empirical  
450 Bayesian approaches was undertaken to identify differences (fold changes). Significance values are  
451 controlled for false discovery, yielding a more rigorous adjusted P value.

452

453 **Quantitative reverse transcription PCR (RT-qPCR).** cDNA was generated using the miScript II RT Kit  
454 (Qiagen). qPCR was performed using the miScript SYBR Green PCR Kit (Qiagen) using miScript Primer  
455 Assays for miRNAs and the using the QuantiTect SYBR Green PCR kit (Qiagen) for mRNA in a  
456 Stratagene Mx3005P qPCR machine (Agilent). All qPCRs were performed in duplicate. Hs\_RNU6-2\_11  
457 miScript Primer was used as a reference gene for sncRNA data normalisation and 18s rRNA was used  
458 for mRNA data normalisation. The PCR efficiency of each miScript Primer was determined by  
459 standard curve and the log<sub>2</sub> fold change calculate by the *Pfaffl* method.

460

461 **Immunoprecipitation and Western blotting.** Lysates were prepared by washing cells x2 in ice-cold  
462 PBS before addition of an appropriate volume of RIPA lysis buffer (ThermoFisher) supplemented  
463 with protease inhibitor (Complete™ Protease Inhibitor Cocktail Tablets, Roche) and for  
464 immunoprecipitation, RNase inhibitor (ThermoFisher). Protein concentrations were determined  
465 using BCA Protein assay Kit (Thermo Scientific Pierce). For immunoprecipitation, equal amounts of  
466 protein were incubated with either a rabbit polyclonal anti-Ago2 antibody or pre-immune rabbit sera

467 overnight at 4°C. This was followed by a 1h incubation at room temperature with 25µl Pierce protein  
468 A Magnetic Beads (Thermo Scientific). The beads were washed and resuspended then either  
469 prepared for Western blotting or added to Qiazol lysis reagent for RNA extraction. For western  
470 blotting, lysates or bead suspensions were prepared by mixing 20µg of protein with 2X Protein  
471 Sample Loading Buffer (Li-Cor) and heated to 98°C for 5min. Samples were loaded onto a 15%  
472 polyacrylamide resolving gel, layered with a 5% stacking gel, alongside a pre-stained protein ladder  
473 (Biorad) and the proteins separated by electrophoresis. Proteins were transferred to a PVDF  
474 membrane using a wet transfer technique. Membranes were first blocked for 1 hr at room  
475 temperature in a 1:1 mixture of PBS and Odyssey blocking buffer (Li-Cor) then incubated with the  
476 primary antibodies diluted in Odyssey blocking buffer and 0.1% Tween at 4°C overnight. Membranes  
477 were washed 4 x for 5min in PBS containing 0.1% Tween before being incubated with the secondary  
478 antibodies diluted in Odyssey blocking buffer and 0.1% Tween for 45min at room temperature.  
479 Primary antibodies used were rabbit anti-Ago2 (Kindly provided by F. Grey), Rat anti-HA, rabbit anti-  
480 actin (Cell signalling) and mouse anti-actin (Cell signalling). The secondary antibodies were DyLight  
481 680 and 800 (Cell Signalling) Membranes underwent a further 4 5min washes in PBS-T and were then  
482 visualised on a G:Box (Syngene).

483

484 **Plasmid and RNA mimic transfection.** Vero cells were seeded at an appropriate density 24 h before  
485 transfection. Both plasmid DNA and RNA mimics were transfected using Transit-X2 (Mirus), following  
486 manufacturer's protocol. In brief 500ng DNA and/or 10µM RNA mimic was diluted in 50µl optiMEM  
487 (LifeTech), 1.5µl transfection reagent was added and incubated for 15 min at room temperature  
488 before adding to 1 well of a 24-well plate. The single-stranded RNA mimics were synthesised (Sigma)  
489 with 5'-phosphorylation and 2'-fluoro modification for stability. The sequences of the RNA mimics  
490 were as follows, ASFVsRNA2 mimic: AUCAAUAGGACUGCUAUA, ASFVsRNA2 polyU mimic:  
491 AUCAAUAGGACUGCUAUAUUUUUUU and negative control: UUCUCCGAACGUGUCACGU. The

492 miRIDIAN microRNA mimic transfection control with Dy547 was sourced from Dharmacon. Mimics  
493 were transfected to give a final concentration of 25nM per well.

494

495 **One-step growth curve.** Vero cells were transfected with RNA mimics as described above and  
496 incubated for 14 h at 37°C. Cells were then infected with ASFV Ba71v at an MOI of 5 for 1 hr at 37°C,  
497 washed x3 and media replaced. Virus was harvested at 0, 4, 8, 12 and 24 hpi by scraping the cells  
498 into the media and freeze-thawing x3. Viral titres were determined by immunofluorescence TCID50  
499 assay on Vero cells using an antibody against ASFV P30 protein. TCID50 was calculated using the  
500 Spearman-Karber method.

501

502 **Immunofluorescence.** Cells were fixed after 3x wash in ice-cold PBS with 10% formalin and  
503 incubated for 30min at room temperature. Cells were washed again 3x in PBS and permeabilised by  
504 the addition of 0.2% triton-X100 diluted in PBS for 5min at room temperature and washed a further  
505 3x in PBS. The primary antibody (mouse anti-ASFV P30) was diluted in PBS with 2% FBS and  
506 incubated with the cells in a humidity chamber for 1hr. Cells were then washed 3x in PBS with 2%  
507 FBS and incubated with secondary antibody (Alexa Fluor 488-conjugated goat anti-mouse IgG) and  
508 fluorescently-tagged phalloidin (Molecular Probes), in a humidity chamber for 1hr. Coverslips were  
509 stained with 300nM DAPI (Life Technologies) for 5 min and then rinsed 3x in PBS with a final rinse in  
510 dH<sub>2</sub>O before being mounted onto a microscope slide, using Vectashield (Vector Labs).

511

512 **Data availability.** Raw data available on NCBI GEO database under accession GSE115512

- 513 1. Blome S, Gabriel C, Beer M. 2013. Pathogenesis of African swine fever in domestic pigs and  
514 European wild boar. *Virus Res* 173:122-30.  
515 2. Sánchez-Vizcaíno JM, Mur L, Gomez-Villamandos JC, Carrasco L. 2015. An Update on the  
516 Epidemiology and Pathology of African Swine Fever. *Journal of Comparative Pathology*  
517 152:9-21.

- 518 3. Koonin EV, Yutin N. 2010. Origin and Evolution of Eukaryotic Large Nucleo-Cytoplasmic DNA  
519 Viruses. *Intervirology* 53:284-292.
- 520 4. Golding JP, Goatley L, Goodbourn S, Dixon LK, Taylor G, Netherton CL. 2016. Sensitivity of  
521 African swine fever virus to type I interferon is linked to genes within multigene families 360  
522 and 505. *Virology* 493:154-161.
- 523 5. Hurtado C, Granja AG, Bustos MJ, Nogal ML, Gonzalez de Buitrago G, de Yebenes VG, Salas  
524 ML, Revilla Y, Carrascosa AL. 2004. The C-type lectin homologue gene (EP153R) of African  
525 swine fever virus inhibits apoptosis both in virus infection and in heterologous expression.  
526 *Virology* 326:160-70.
- 527 6. Zhang F, Moon A, Childs K, Goodbourn S, Dixon LK. 2010. The African Swine Fever Virus  
528 DP71L Protein Recruits the Protein Phosphatase 1 Catalytic Subunit To Dephosphorylate  
529 eIF2 $\alpha$  and Inhibits CHOP Induction but Is Dispensable for These Activities during Virus  
530 Infection. *Journal of Virology* 84:10681-10689.
- 531 7. Silk RN, Bowick GC, Abrams CC, Dixon LK. 2007. African swine fever virus A238L inhibitor of  
532 NF-kappaB and of calcineurin phosphatase is imported actively into the nucleus and  
533 exported by a CRM1-mediated pathway. *J Gen Virol* 88:411-9.
- 534 8. Reis AL, Netherton C, Dixon LK. 2017. Unraveling the Armor of a Killer: Evasion of Host  
535 Defenses by African Swine Fever Virus. *Journal of Virology* 91:e02338-16.
- 536 9. Yang JX, Rastetter RH, Wilhelm D. 2016. Non-coding RNAs: An Introduction, p 13-32. *In*  
537 Wilhelm D, Bernard P (ed), *Non-coding RNA and the Reproductive System*. Springer  
538 Netherlands, Dordrecht.
- 539 10. Guo YE, Steitz JA. 2014. Virus meets host microRNA: the destroyer, the booster, the hijacker.  
540 *Mol Cell Biol* 34:3780-7.
- 541 11. Kincaid RP, Sullivan CS. 2012. Virus-Encoded microRNAs: An Overview and a Look to the  
542 Future. *PLOS Pathogens* 8:e1003018.
- 543 12. Piedade D, Azevedo-Pereira JM. 2016. The Role of microRNAs in the Pathogenesis of  
544 Herpesvirus Infection. *Viruses* 8:156.
- 545 13. Lei X, Bai Z, Ye F, Xie J, Kim C-G, Huang Y, Gao S-J. 2010. Regulation of NF- $\kappa$ B inhibitor I $\kappa$ B $\alpha$   
546 and viral replication by a KSHV microRNA. *Nature Cell Biology* 12:193.
- 547 14. Tycowski KT, Guo YE, Lee N, Moss WN, Vallery TK, Xie M, Steitz JA. 2015. Viral noncoding  
548 RNAs: more surprises. *Genes & development* 29:567-584.
- 549 15. Shen W, Sa e Silva M, Jaber T, Vitvitskaia O, Li S, Henderson G, Jones C. 2009. Two Small  
550 RNAs Encoded within the First 1.5 Kilobases of the Herpes Simplex Virus Type 1 Latency-  
551 Associated Transcript Can Inhibit Productive Infection and Cooperate To Inhibit Apoptosis.  
552 *Journal of Virology* 83:9131-9139.
- 553 16. Marcinowski L, Tanguy M, Krmpotic A, Rädle B, Lisnić VJ, Tuddenham L, Chane-Woon-Ming  
554 B, Ruzsics Z, Erhard F, Benkartek C, Babic M, Zimmer R, Trgovcich J, Koszinowski UH, Jonjic S,  
555 Pfeffer S, Dölken L. 2012. Degradation of Cellular miR-27 by a Novel, Highly Abundant Viral  
556 Transcript Is Important for Efficient Virus Replication *In Vivo*. *PLoS Pathog*  
557 8:e1002510.
- 558 17. Backes S, Shapiro Jillian S, Sabin Leah R, Pham Alissa M, Reyes I, Moss B, Cherry S, tenOever  
559 Benjamin R. 2012. Degradation of Host MicroRNAs by Poxvirus Poly(A) Polymerase Reveals  
560 Terminal RNA Methylation as a Protective Antiviral Mechanism. *Cell Host & Microbe* 12:200-  
561 210.
- 562 18. Buck AH, Ivens A, Gordon K, Craig N, Houzelle A, Roche A, Turnbull N, Beard PM. 2015.  
563 Quantitative Analysis of MicroRNAs in *Vaccinia virus* Infection Reveals  
564 Diversity in Their Susceptibility to Modification and Suppression. *PLoS ONE* 10:e0131787.
- 565 19. Manzano-Roman R, Diaz-Martin V, Oleaga A, Siles-Lucas M, Perez-Sanchez R. 2012.  
566 Subolesin/akirin orthologs from *Ornithodoros* spp. soft ticks: cloning, RNAi gene silencing  
567 and protective effect of the recombinant proteins. *Vet Parasitol* 185:248-59.

- 568 20. Núñez-Hernández F, Pérez LJ, Muñoz M, Vera G, Accensi F, Sánchez A, Rodríguez F, Núñez JI.  
569 2017. Differential expression of porcine microRNAs in African swine fever virus infected pigs:  
570 a proof-of-concept study. *Virology Journal* 14:198.
- 571 21. Núñez-Hernández F, Vera G, Sánchez A, Rodríguez F, Núñez JI. 2018. African swine fever  
572 virus does not express viral microRNAs in experimentally infected pigs. *BMC Veterinary*  
573 *Research* 14:268.
- 574 22. Tav C, Poligny L, Tempel S, Tahi F. 2016. miRNAFold: a web server for fast miRNA precursor  
575 prediction in genomes. *Nucleic Acids Research* 44:W181-W184.
- 576 23. Chorn G, Klein-McDowell M, Zhao L, Saunders MA, Flanagan WM, Willingham AT, Lim LP.  
577 2012. Single-stranded microRNA mimics. *RNA (New York, NY)* 18:1796-1804.
- 578 24. OIE. 2019. Disease Timelines, African Swine Fever.  
579 [https://www.oie.int/wahis\\_2/public/wahid.php/Diseaseinformation/Diseasetimeslines](https://www.oie.int/wahis_2/public/wahid.php/Diseaseinformation/Diseasetimeslines).  
580 Accessed
- 581 25. Li X, Tian K. 2018. African swine fever in China. *Veterinary Record* 183:300-301.
- 582 26. Yutin N, Wolf YI, Raoult D, Koonin EV. 2009. Eukaryotic large nucleo-cytoplasmic DNA  
583 viruses: Clusters of orthologous genes and reconstruction of viral genome evolution.  
584 *Virology Journal* 6:1-13.
- 585 27. Libri V, Miesen P, van Rij RP, Buck AH. 2013. Regulation of microRNA biogenesis and  
586 turnover by animals and their viruses. *Cell Mol Life Sci* 70:3525-44.
- 587 28. Anselmo A, Flori L, Jaffrezic F, Rutigliano T, Cecere M, Cortes-Perez N, Lefèvre F, Rogel-  
588 Gaillard C, Giuffra E. 2011. Co-Expression of Host and Viral MicroRNAs in Porcine Dendritic  
589 Cells Infected by the Pseudorabies Virus. *PLoS ONE* 6:e17374.
- 590 29. Sánchez EG, Pérez-Núñez D, Revilla Y. 2017. Mechanisms of Entry and Endosomal Pathway  
591 of African Swine Fever Virus. *Vaccines* 5:42.
- 592 30. Zhang Y-N, Liu Y-Y, Xiao F-C, Liu C-C, Liang X-D, Chen J, Zhou J, Baloch AS, Kan L, Zhou B, Qiu  
593 H-J. 2018. Rab5, Rab7, and Rab11 Are Required for Caveola-Dependent Endocytosis of  
594 Classical Swine Fever Virus in Porcine Alveolar Macrophages. *Journal of Virology* 92:e00797-  
595 18.
- 596 31. Wang D, Xia M, Yan X, Li D, Wang L, Xu Y, Jin T, Ling W. 2012. Gut Microbiota Metabolism of  
597 Anthocyanin Promotes Reverse Cholesterol Transport in Mice Via Repressing miRNA-10b.  
598 *Circulation Research* 111:967-981.
- 599 32. Cuesta-Geijo MA, Chiappi M, Galindo I, Barrado-Gil L, Munoz-Moreno R, Carrascosa JL,  
600 Alonso C. 2016. Cholesterol Flux Is Required for Endosomal Progression of African Swine  
601 Fever Virions during the Initial Establishment of Infection. *J Virol* 90:1534-43.
- 602 33. Yan Y, Cui H, Jiang S, Huang Y, Huang X, Wei S, Xu W, Qin Q. 2011. Identification of a novel  
603 marine fish virus, Singapore grouper iridovirus-encoded microRNAs expressed in grouper  
604 cells by Solexa sequencing. *PLoS One* 6:e19148.
- 605 34. Yuan JM, Chen YS, He J, Weng SP, Guo CJ, He JG. 2016. Identification and differential  
606 expression analysis of MicroRNAs encoded by Tiger Frog Virus in cross-species infection in  
607 vitro. *Virol J* 13:73.
- 608 35. García-Beato R, Salas ML, Viñuela E, Salas J. 1992. Role of the host cell nucleus in the  
609 replication of African swine fever virus DNA. *Virology* 188:637-649.
- 610 36. Withers JB, Mondol V, Pawlica P, Rosa-Mercado NA, Tycowski KT, Ghasempur S, Torabi SF,  
611 Steitz JA. 2019. Idiosyncrasies of Viral Noncoding RNAs Provide Insights into Host Cell  
612 Biology. *Annual Review of Virology* 6:null.
- 613 37. Bogerd HP, Karnowski HW, Cai X, Shin J, Pohlens M, Cullen BR. 2010. A Mammalian  
614 Herpesvirus Uses Noncanonical Expression and Processing Mechanisms to Generate Viral  
615 MicroRNAs. *Molecular Cell* 37:135-142.
- 616 38. Zhou X, Guo H, Chen K, Cheng H, Zhou R. 2010. Identification, chromosomal mapping and  
617 conserved synteny of porcine Argonaute family of genes. *Genetica* 138:805-812.

- 618 39. Liu J, Carmell MA, Rivas FV, Marsden CG, Thomson JM, Song J-J, Hammond SM, Joshua-Tor L,  
619 Hannon GJ. 2004. Argonaute2 Is the Catalytic Engine of Mammalian RNAi. *Science* 305:1437-  
620 1441.
- 621 40. Dueck A, Ziegler C, Eichner A, Berezikov E, Meister G. 2012. microRNAs associated with the  
622 different human Argonaute proteins. *Nucleic Acids Research* 40:9850-9862.
- 623 41. Rodríguez JM, Salas ML. 2013. African swine fever virus transcription. *Virus Research* 173:15-  
624 28.
- 625 42. Almazán F, Rodríguez JM, Andrés G, Pérez R, Viñuela E, Rodríguez JF. 1992. Transcriptional  
626 analysis of multigene family 110 of African swine fever virus. *Journal of virology* 66:6655-  
627 6667.
- 628 43. De Almeida C, Scheer H, Zuber H, Gagliardi D. 2018. RNA uridylation: a key  
629 posttranscriptional modification shaping the coding and noncoding transcriptome. *Wiley*  
630 *Interdisciplinary Reviews: RNA* 9:e1440.
- 631 44. Heo I, Ha M, Lim J, Yoon M-J, Park J-E, Kwon SC, Chang H, Kim VN. 2012. Mono-Uridylation of  
632 Pre-MicroRNA as a Key Step in the Biogenesis of Group II let-7 MicroRNAs. *Cell* 151:521-532.
- 633 45. Jones MR, Quinton LJ, Blahna MT, Neilson JR, Fu S, Ivanov AR, Wolf DA, Mizgerd JP. 2009.  
634 Zcchc11-dependent uridylation of microRNA directs cytokine expression. *Nature Cell Biology*  
635 11:1157.
- 636 46. Baek D, Villén J, Shin C, Camargo FD, Gygi SP, Bartel DP. 2008. The impact of microRNAs on  
637 protein output. *Nature* 455:64.
- 638 47. Aalto AP, Pasquinelli AE. 2012. Small non-coding RNAs mount a silent revolution in gene  
639 expression. *Current Opinion in Cell Biology* 24:333-340.
- 640 48. Grey F, Meyers H, White EA, Spector DH, Nelson J. 2007. A Human Cytomegalovirus-Encoded  
641 microRNA Regulates Expression of Multiple Viral Genes Involved in Replication. *PLOS*  
642 *Pathogens* 3:e163.
- 643 49. Chapman DA, Tcherepanov V, Upton C, Dixon LK. 2008. Comparison of the genome  
644 sequences of non-pathogenic and pathogenic African swine fever virus isolates. *J Gen Virol*  
645 89:397-408.
- 646 50. Enjuanes L, Carrascosa AL, Moreno MA, Vinuela E. 1976. Titration of African swine fever  
647 (ASF) virus. *J Gen Virol* 32:471-7.
- 648 51. Pall GS, Hamilton AJ. 2008. Improved northern blot method for enhanced detection of small  
649 RNA. *Nature Protocols* 3:1077.

650

651

652

653

654

655

656

657



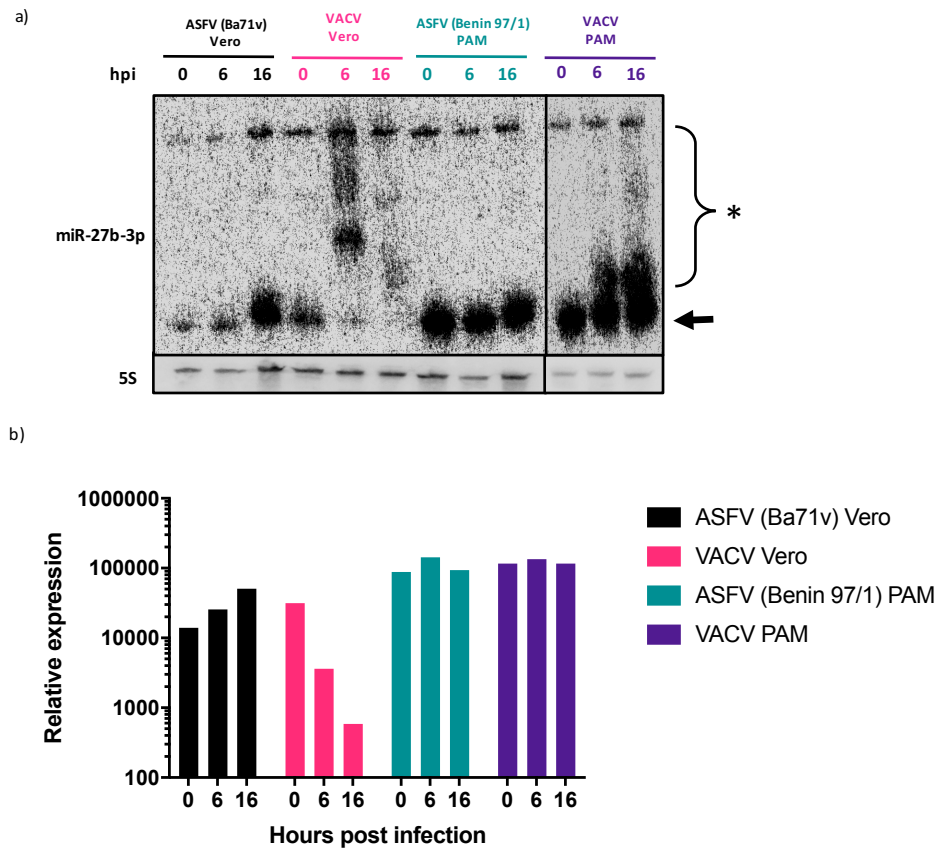

**Figure 1: Infection with ASFV does not induce miRNA polyadenylation or decay. a)**

Northern blot of RNA extracted from Vero cells and porcine alveolar macrophages (PAMs) that were infected with either ASFV or VACV. The blot was probed for miR-27b-3p and 5s and imaged on a Phosphorimager. Arrow: mature miRNA, asterisk: polyadenylated miRNA **b)** Phosphorimager quantification of miR-27b-3p expression, normalised to 5S rRNA. The image and quantification is representative of 2 biological repeats.

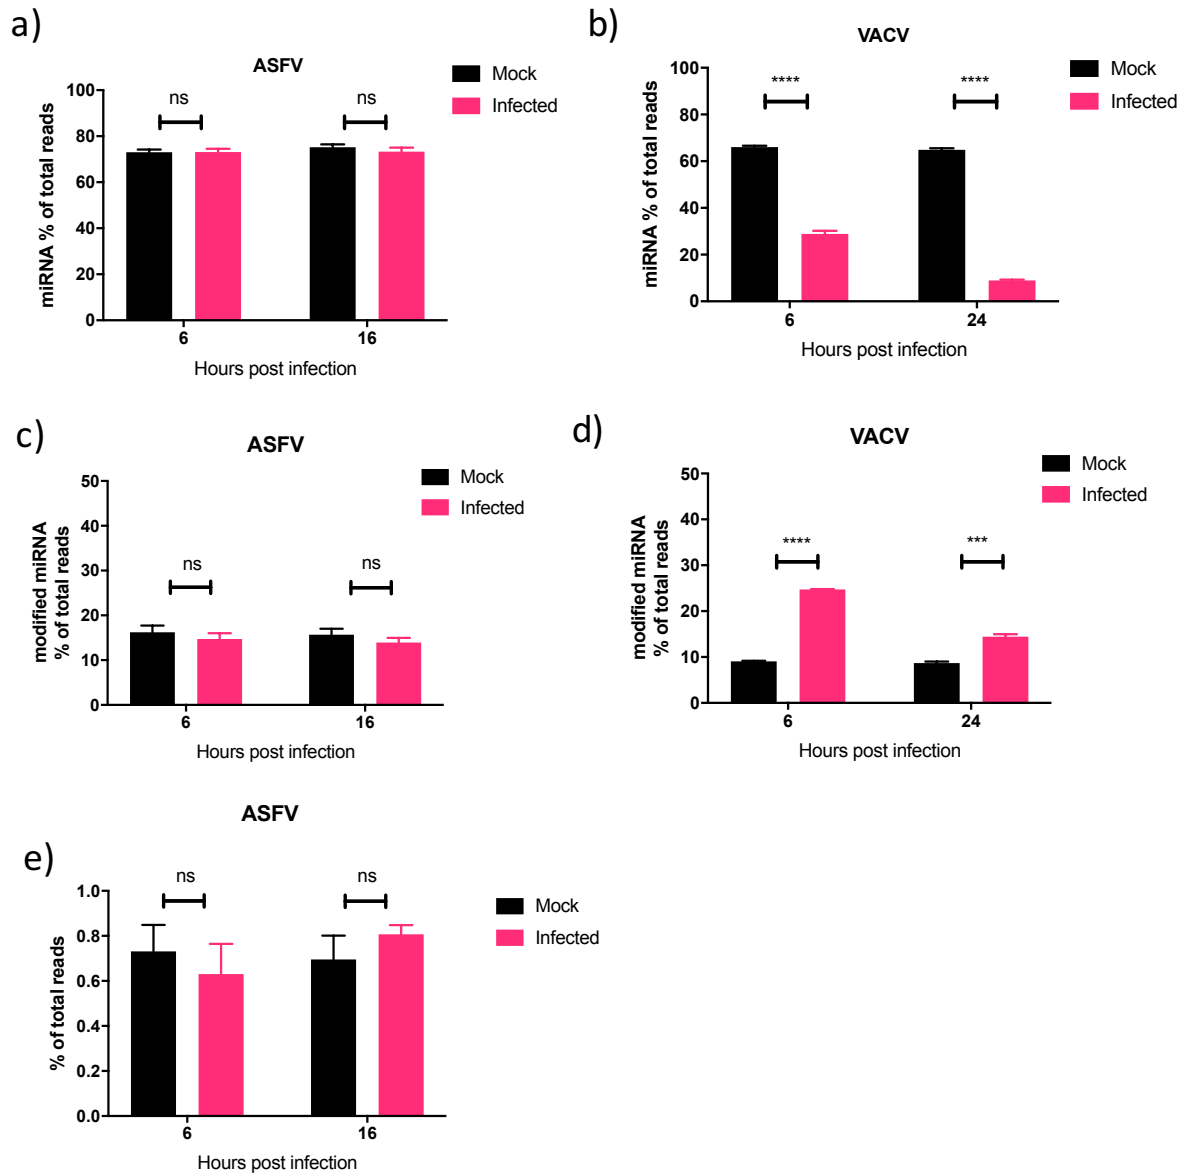

**Figure 2: ASFV does not induce widespread polyadenylation or decay of cellular miRNAs.** The proportion of sequencing reads that mapped to known host miRNAs a) PAMs infected or mock-infected with ASFV and in b) HeLa cells infected or mock infected with VACV at early and late time points. The proportion of 3' modified miRNA, which contained at least 1 non-templated nucleotide after position 19 as a proportion total sequencing reads in c) ASFV mock and infected PAMs and d) VACV mock and infected HeLas. e) Proportion of miRNA containing 3 or more 3' non-templated adenosine residues after nt position 19 in ASFV mock and infected PAMs. Data represent mean of 3 biological replicates, error bars represent SEM. Data was statistically analysed using Student T-test: ns,  $p > 0.05$ , \*\*\*,  $p < 0.001$ , \*\*\*\*,  $p < 0.0001$ . Data from b) and d) is taken from supporting information from (18) and represents mean of 3 biological replicates.

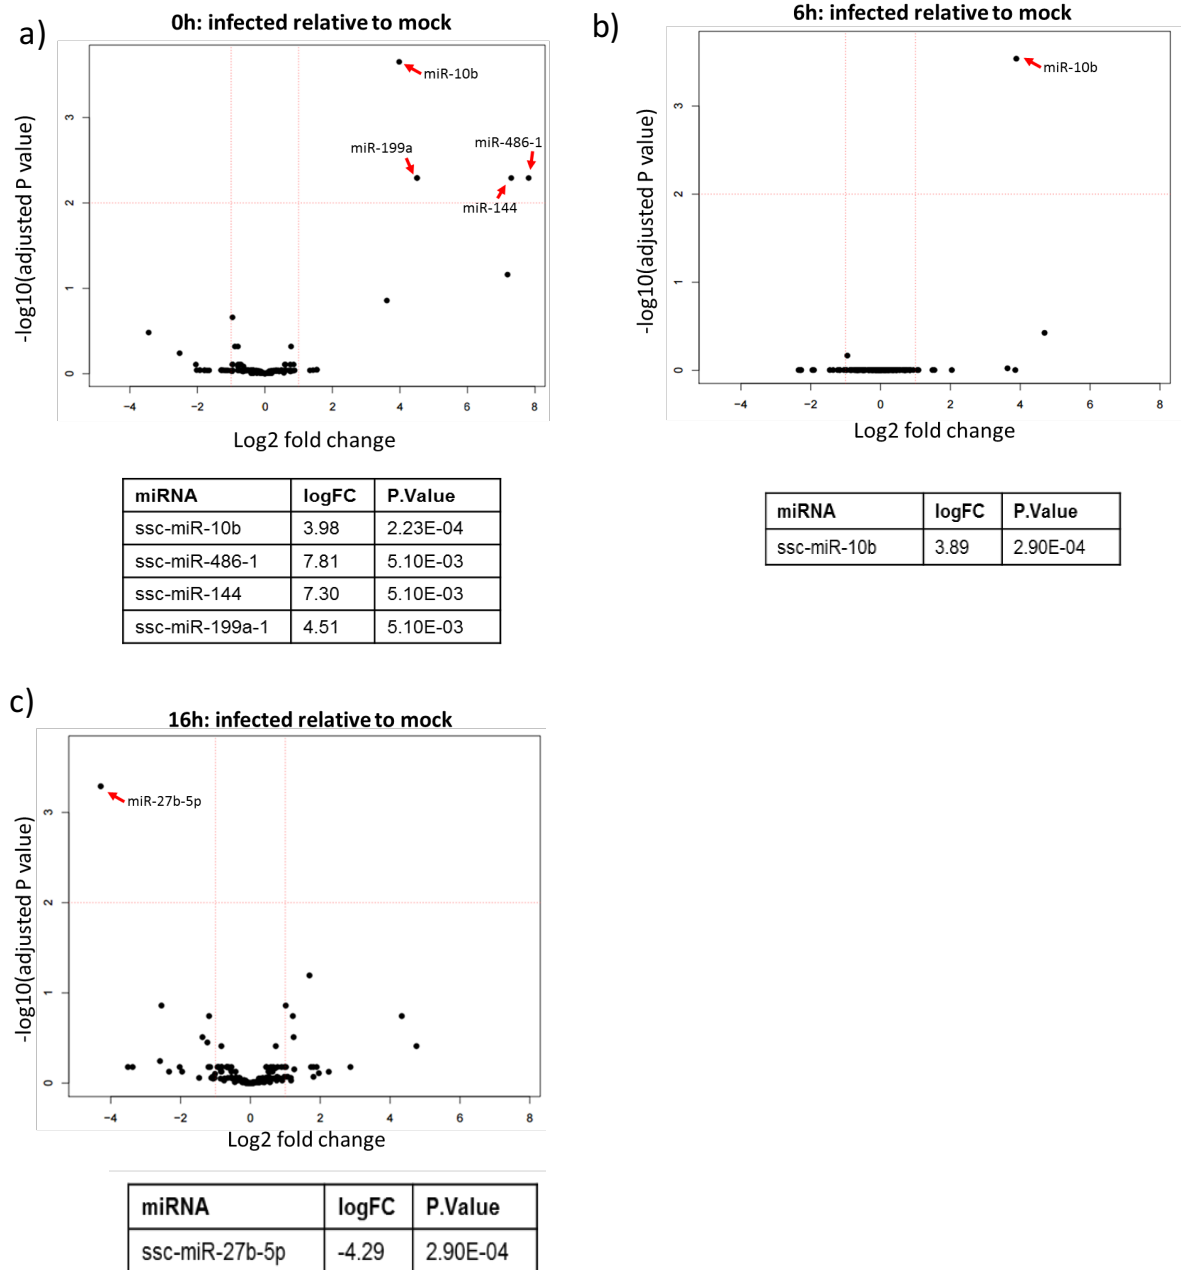

**Figure 3: ASFV infection induces rapid changes in the abundance of a select number of miRNAs in PAMs.** Volcano plots showing the differential expression of host miRNAs in ASFV infected cells relative to mock infected at 0 hpi (a), 6 hpi (b) and 16 hpi (c). The miRNAs that were differentially expressed with a significant adjusted P-value ( $\leq 0.05$ ) are detailed in the table below each volcano plot.

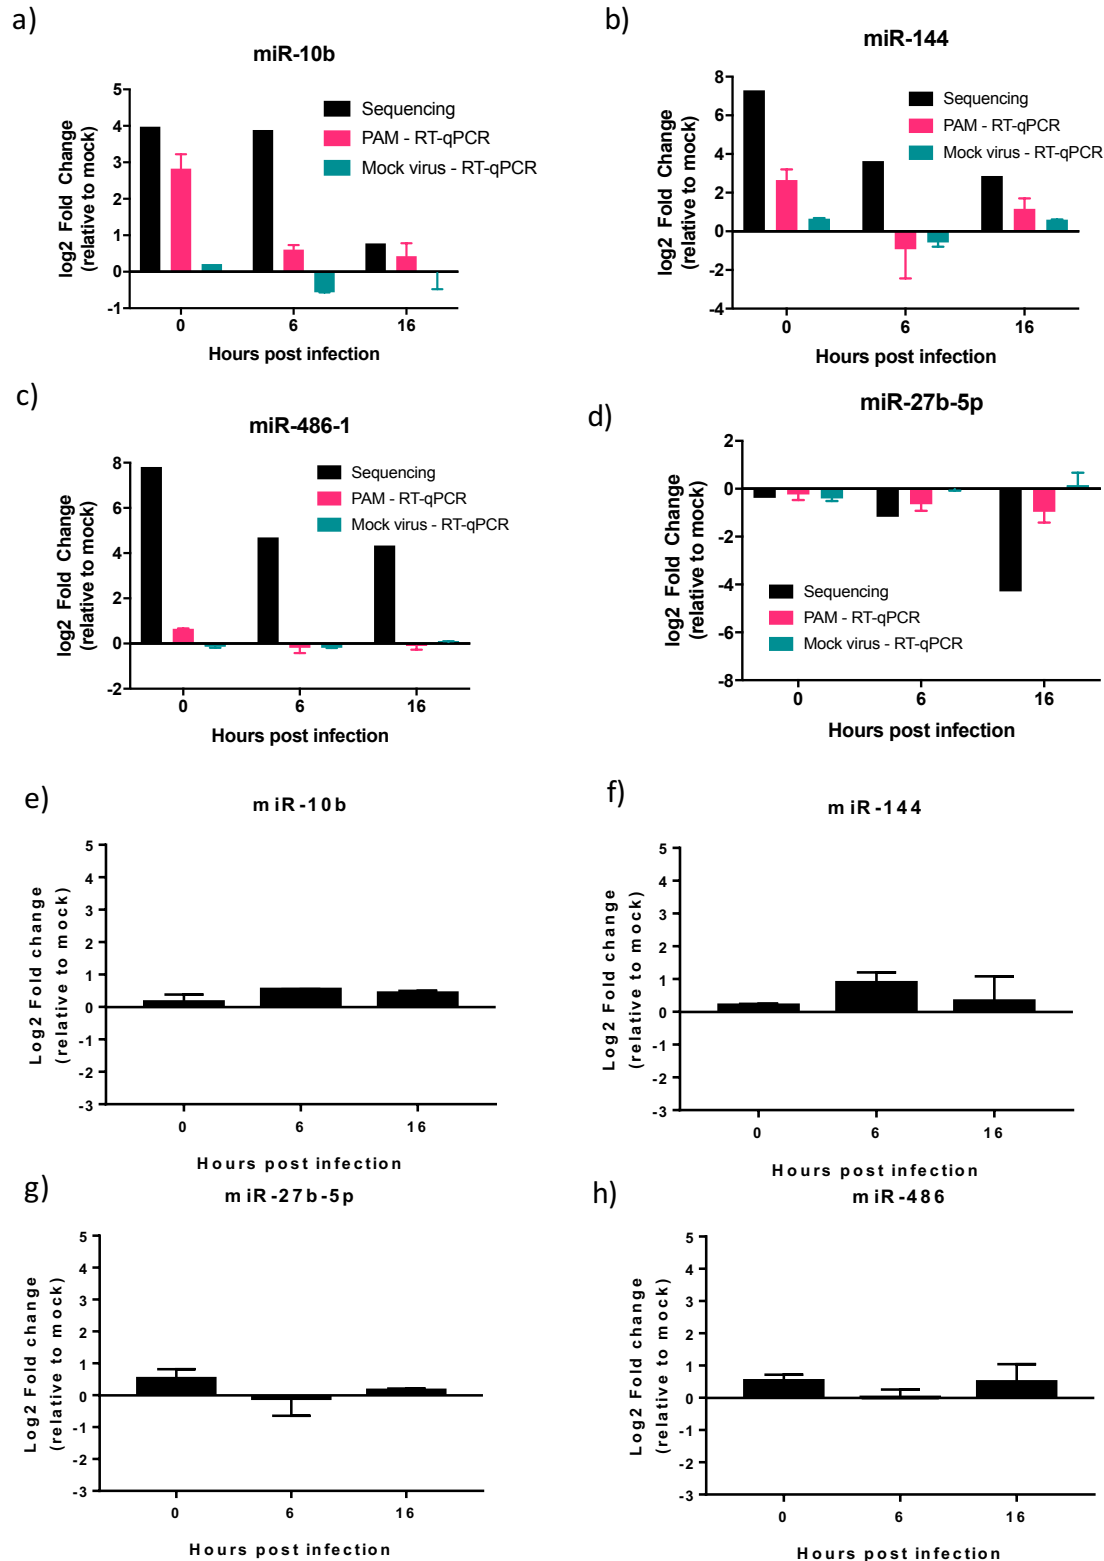

**Figure 4: Differential expression of miR-10b and miR-144 in ASFV Benin 97/1 infected PAMs but not ASFV Ba71v infected Vero cells.** (a-d) Changes in expression of miR-10b (a), miR-144 (b), miR-27b-5p (c) or miR-486-1 (d) in PAMs infected with ASFV Benin 97/1 or after the addition of a mock virus preparation at 0, 6 and 16 hpi were measured by RT-qPCR. Fold changes from miRNA sequencing are provided for comparison. (e-h) Changes in expression of miR-10b (e), miR-144 (f), miR-27b-5p (g) or miR-486-1 (h) in Vero cells infected with ASFV Ba71v at 0, 6 and 16 hpi were measured by RT-qPCR. miRNA expression was normalised to U6 small RNA and fold change calculated by *Pfaffl* method. Data represents mean of 3 biological replicates, error bars indicate SEMs. Black bars: sequencing data results, pink bars: Benin 97/1 infected PAM RT-qPCR results, teal bars: Mock virus treated PAMs RT-qPCR results.

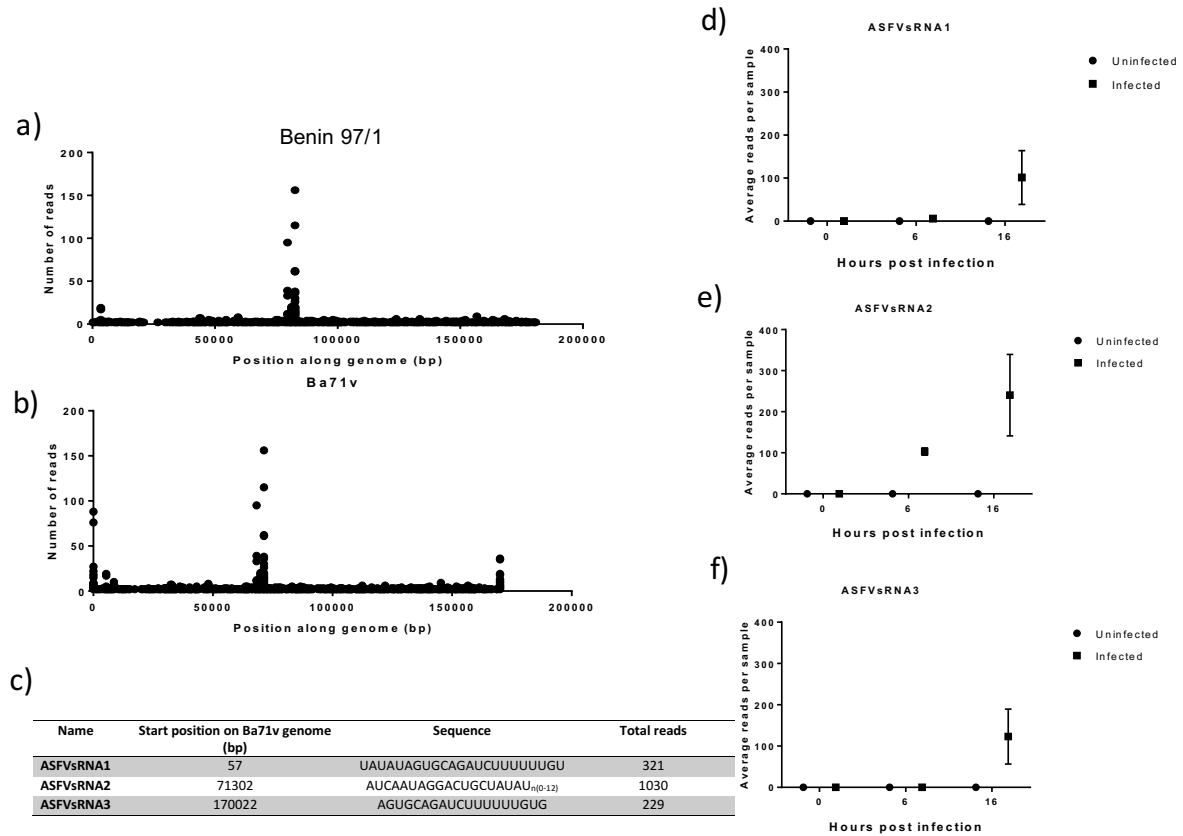

**Figure 5: Mapping of unaligned small RNA reads to ASFV genome reveals peaks of small RNA sequences.** a) Plot showing small RNA sequencing reads mapping to the ASFV Benin 97/1 genome, the position along the genome in bp is along the x-axis and the number of reads on the y-axis b) Plot of reads mapping to the Ba71v ASFV genome (this sequence includes the inverted terminal repeats). c) Table detailing the location and sequence of the peaks in reads. The average (mean) number of reads per sample at each time point is shown for d) ASFVsRNA1 , e) ASFVsRNA2 and f) ASFVsRNA3. Error bars indicate SEMs.

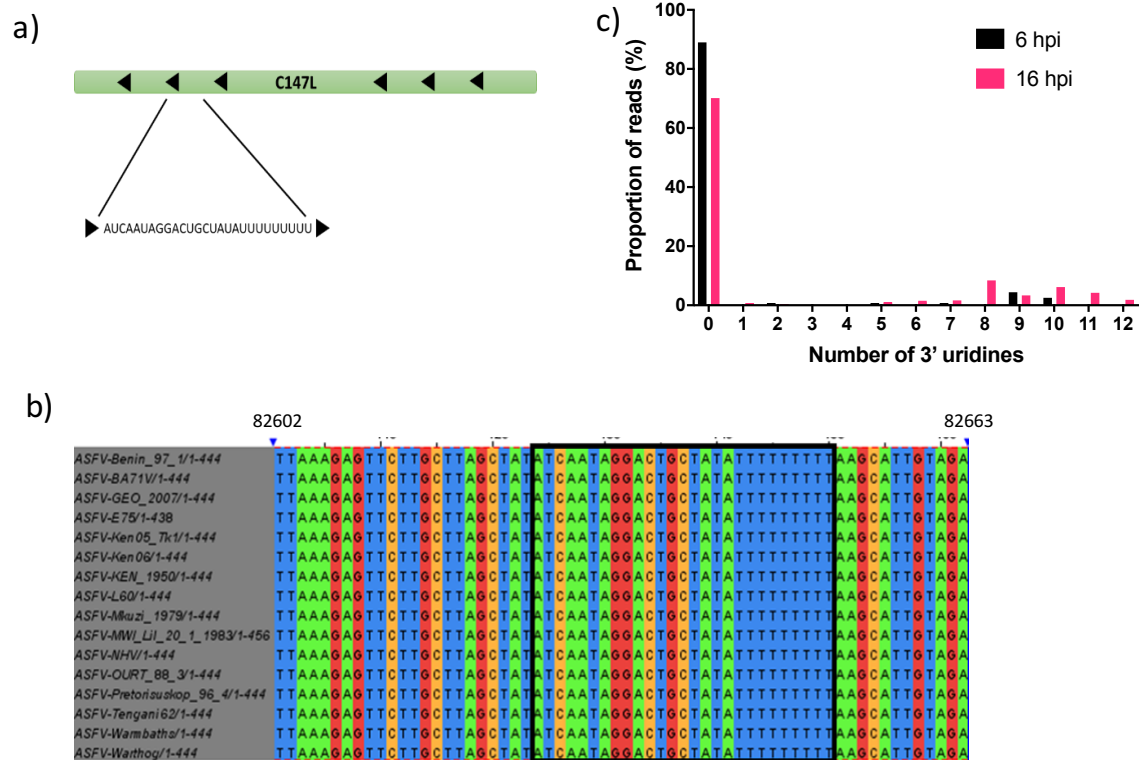

**Figure 6: Alignment of ASFVsRNA2 to the ASFV genome.** a) Location of the ASFVsRNA2 sequence in the C147L coding region, arrows represent coding direction. b) alignment of this region in multiple strains of ASFV, the boxed region highlights the ASFVsRNA2 sequence (alignment performed using clustal omega). Numbering is the genome position in ASFV Benin 97/1. c) The proportion of reads and the number of 3' uridine residues of ASFVsRNA2.

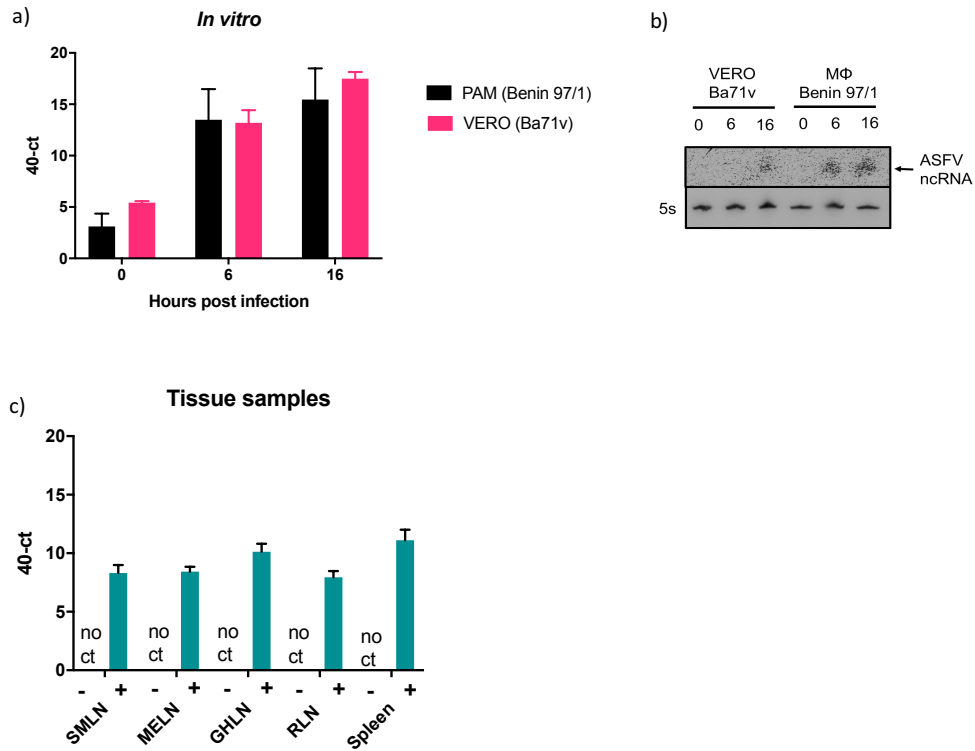

**Figure 7: ASFVsRNA2 is expressed *in vivo*.** Expression of ASFVsRNA2 was determined in ASFV-infected porcine macrophages and VERO cells at 0, 6 and 16 hpi by RT-qPCR (A) or Northern blot (B). 5s rRNA serves as a loading control. C) RT-qPCR analysis of ASFVsRNA2 expression in tissue sample from pigs infected with ASFV OURT88/1. (SMLN: submandibular lymph node, MELN: mesenteric lymph node, GHLN: gastrohepatic lymph node, RLN: renal lymph node). In panels a) and c), data represents mean of 3 biological replicates and error bars indicate SEMs.

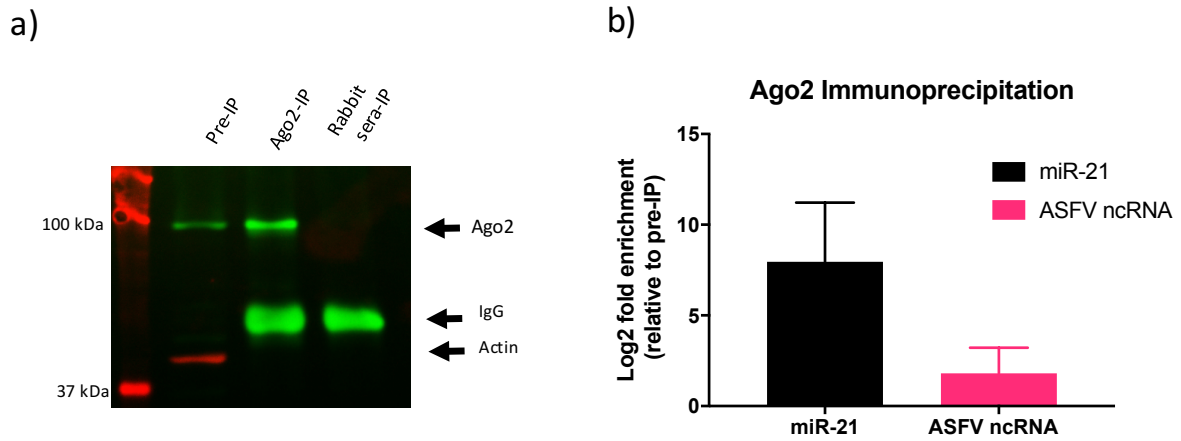

**Figure 8: ASFVsRNA2 is not produced through the canonical miRNA biogenesis pathway.** A) Western blot of ASFV-infected PAM lysates before and after Ago2 immunoprecipitation using anti Ago-2 and anti-actin antibodies. Pre-IP: lysate before immunoprecipitation, ago2-IP: Ago2 immunoprecipitation lysate. Rabbit-IP: pre-immune rabbit sera control immunoprecipitation b) The log2 fold enrichment after RT-qPCR for miR-21 and ASFVsRNA2 in the ago2 immunoprecipitation. Expression was normalised to U6 small RNA and fold change calculated by *Pfaffl* method. Data represents mean of 3 technical replicates and error bars indicate SEMs.



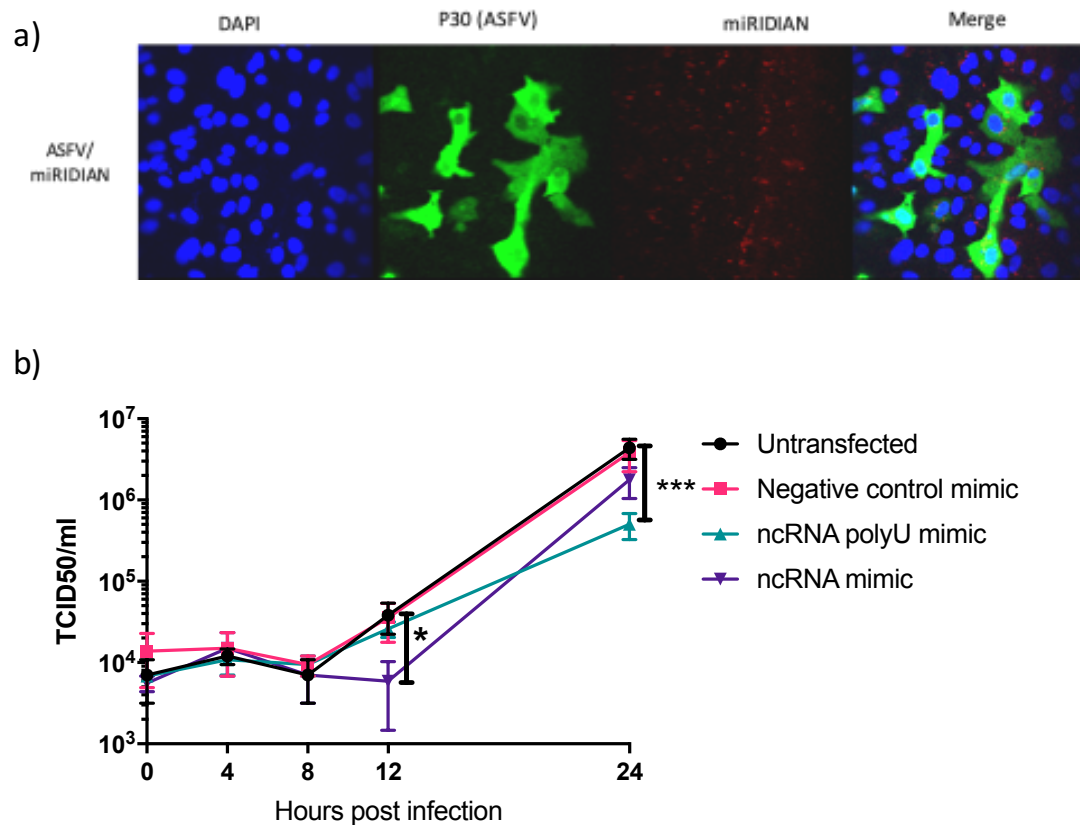

**Figure 9: Overexpression of ASFVsRNA2 leads to a reduction in ASFV replication.** A) VERO cells transfected with miRIDIAN mimic transfection control with Dy547 for 24h were subsequently infected with ASFV Ba71v (MOI: 5). After 24h cells were fixed and labelled to confirm cells can be successfully transfected and infected. B) VERO cells were transfected with RNA mimics of ASFVsRNA2, with and without polyU sequence. After 24h cells were infected with ASFV Ba71v (MOI: 5) and supernatants were taken at 0, 4, 8, 12 and 24 hpi and titrated on Vero cells. TCID50 calculated by Spearman-Kärber method. Error bars indicate SEMs \*P= 0.0111, \*\*\*P=0.001, repeated measures two-way ANOVA. Representative of 2 biological repeats.
